# Supplementary material
Source: PubMed Central journal article supplement (PMC3194948)
Supplement: supp_85_21_11146__1.pdf [file supp_85_21_11146__1.pdf]

A

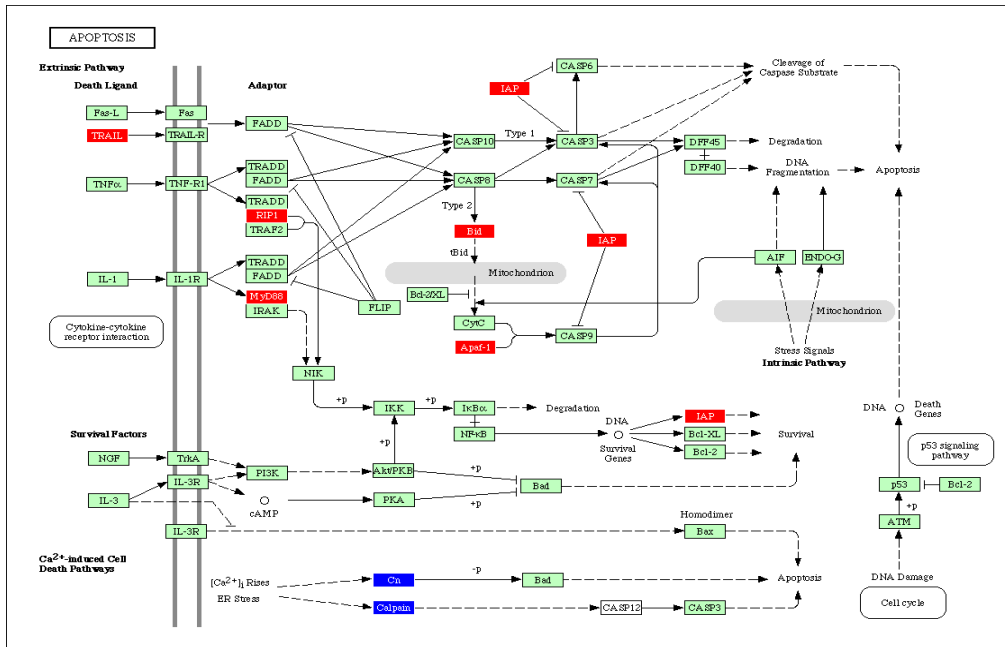

B

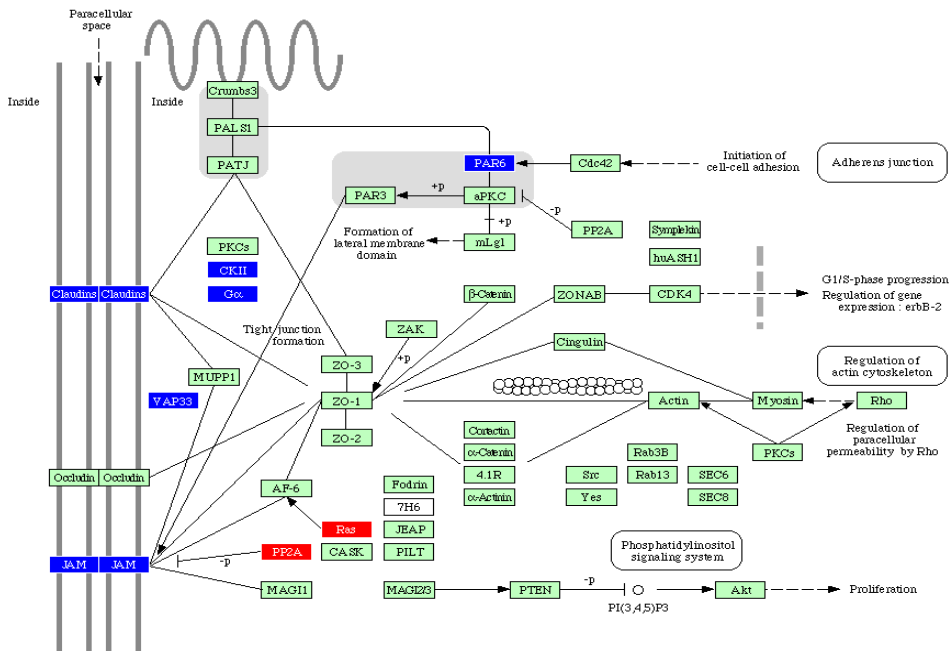

Supplementary Figure 1: Pathway Express analysis of the host response to MDV infection in the spleen at 4dpi. (A). Many genes in the apoptosis pathway are seen to be up-regulated (red). (B). Many genes in the tight-junction pathway are seen to be down-regulated (blue).
