# Supplementary material
Source: PubMed Central journal article supplement (PMC3194948)
Supplement: supp_85_21_11146__2.pdf [file supp_85_21_11146__2.pdf]

## Supplementary Figure 2:

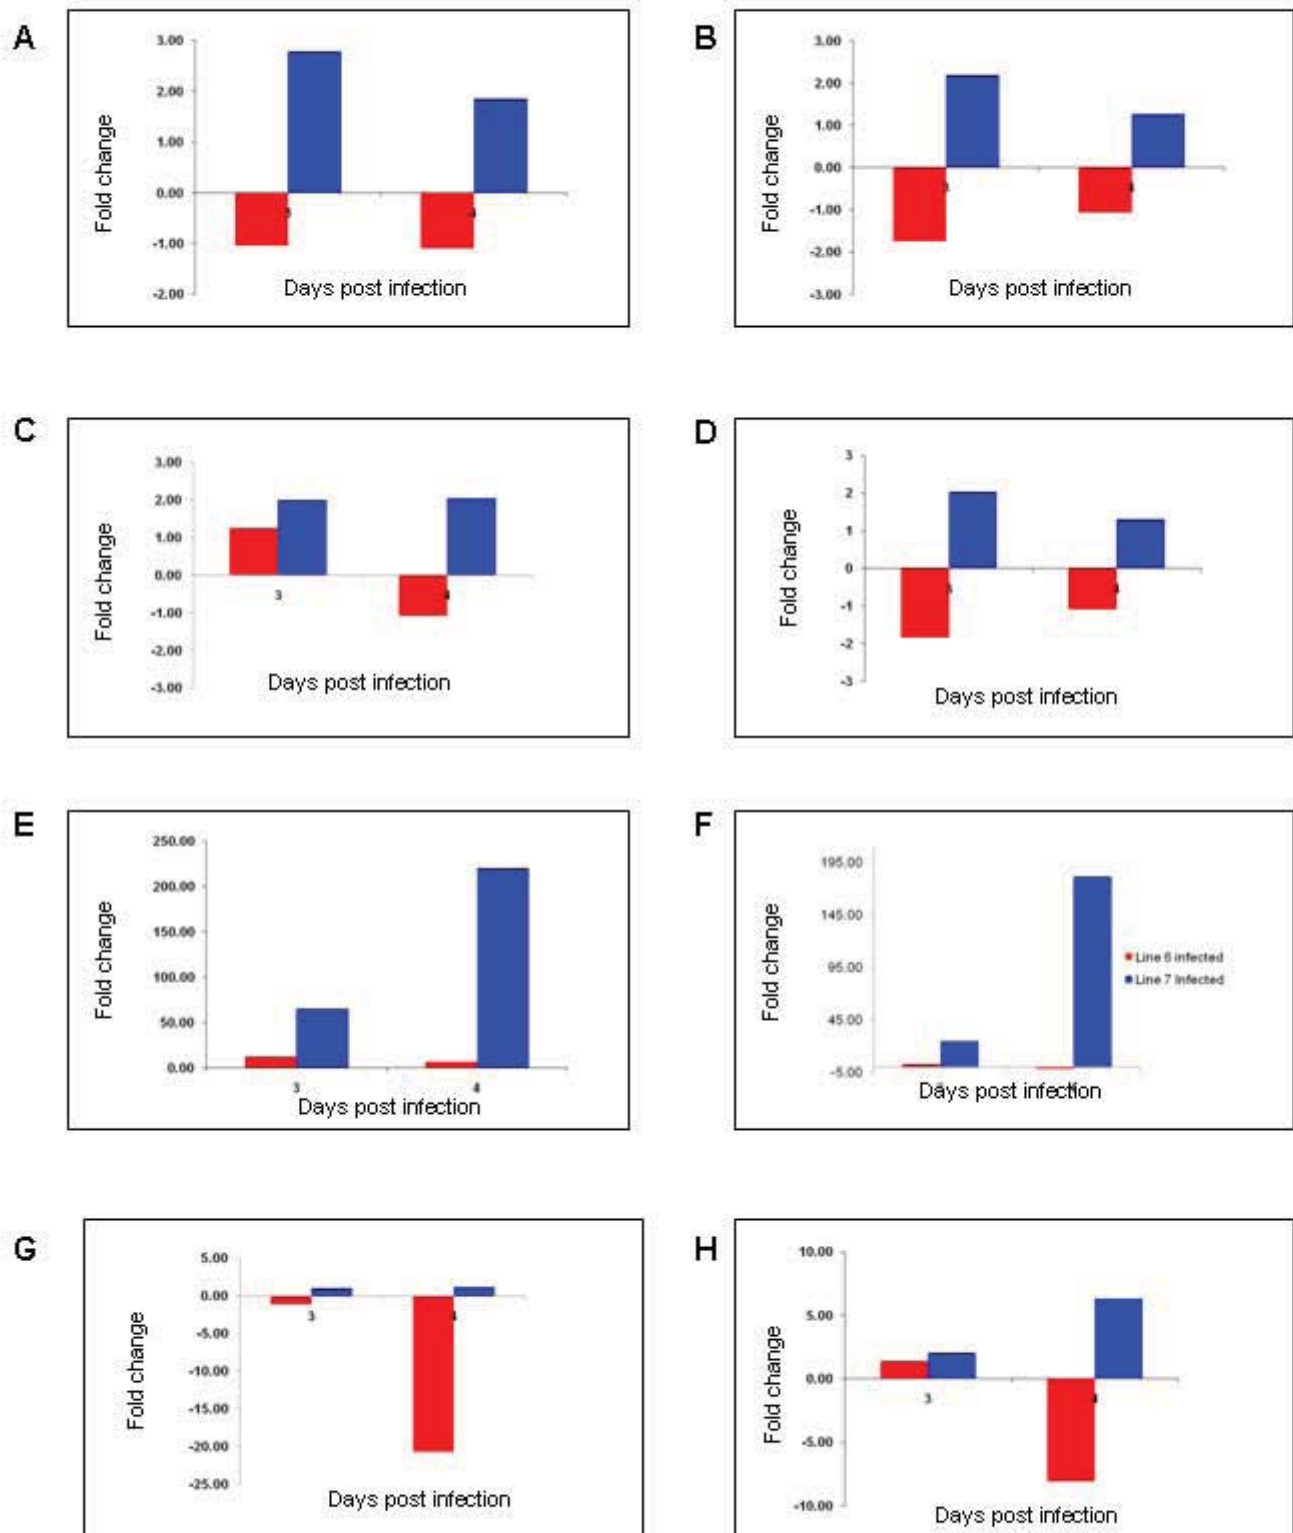

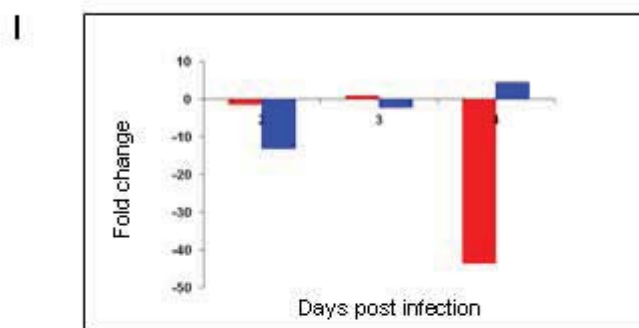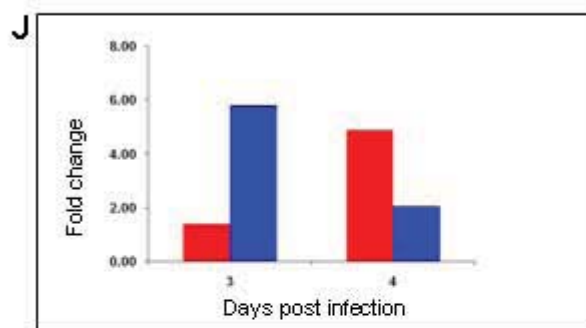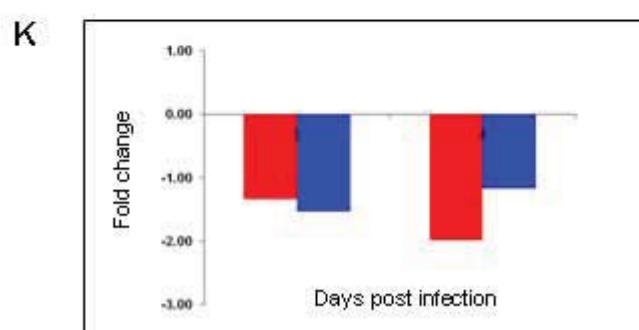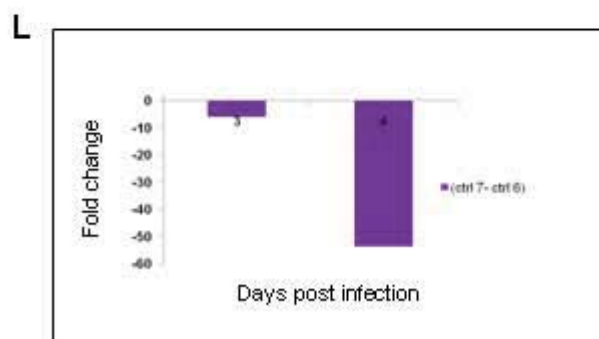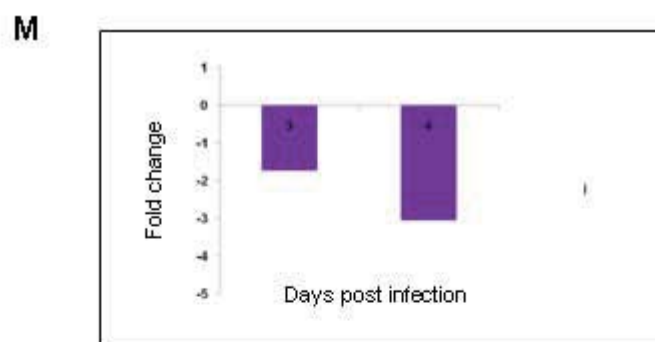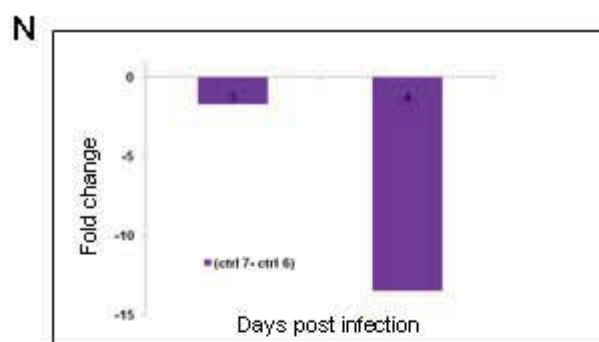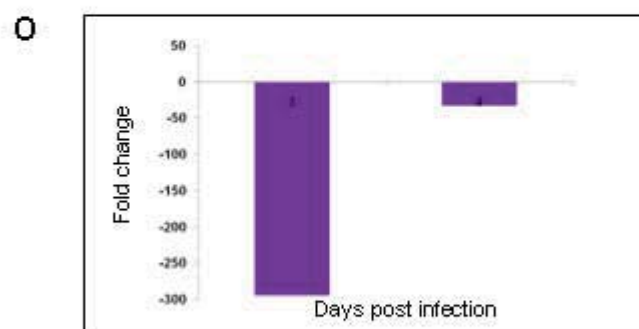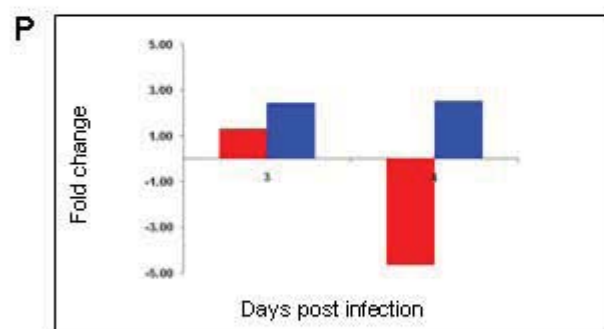

Q

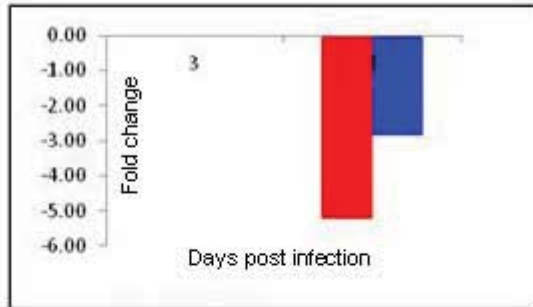

**Legend:** ■ Line 6<sub>1</sub> (Infected-control) ■ Line 7<sub>2</sub> (Infected-control) ■ Line 7 control-line 6 control

**Supplementary Figure 2:** qRT-PCR analysis of 17 genes differentially expressed by microarray analysis between susceptible and resistant lines of birds during MDV infection. (A). IL6 (B). IL18 (C). TLR15 (D). IFNA (E). MX1 (F). AVD (G). AMIGO2 (H). IRG1 (I). IgG-H (J). MMP9 (K). MMP13 (L). DDT (M). DNAJC3 (N). GNG12 (O). SFTPA2 (P). FN1. (Q). CLEC3B. In L-O, a negative fold-change value indicates higher expression in the resistant line compared to the susceptible line.
